# Supplementary material for: A Larger Slice or a Larger Pie? An Empirical Investigation of Bargaining Power in the Distribution Channel
Source: Atypon-hosted journal article supplement (doi:10.1287/mksc.1080.0472), 2008-01-01
Supplement: mksc.1080.0472-sm.pdf [file mksc.1080.0472-sm.pdf]

# Bargaining Power in the Distribution Channel

Draganska, M., Klapper, D. and Villas-Boas, S.  
(2010), A Larger Slice or a Larger Pie? An  
Empirical Investigation of Bargaining Power  
in the Distribution Channel, Marketing Science,  
Vol. 29, 57-74.

# Motivation

- Power in the channel subject of much discussion in the marketing literature
- Very little evidence that manufacturers are suffering despite the rise in retailer power
- Complex negotiations between manufacturers and retailers have posed challenges to researchers

# How do we think about power?

- What is the size of the pie?
  - Pricing power vis-à-vis consumers
- What slice of the pie goes to manufacturers and retailers?
  - What do the parties have at stake (bargaining position)?
  - How “good” are the parties at negotiating (bargaining power)?

# Contribution to the literature

- Derive a theoretically consistent and empirically tractable bargaining model of channel interactions
- Extend recent theoretical literature on bargaining to empirically rich and realistic setting, most notably incorporating consumer heterogeneity
- Measure bargaining position and bargaining power of channel participants
- Relate bargaining power to exogenous manufacturer and retailer characteristics

# Modeling approach

- Estimate random coefficients logit demand model to obtain substitution patterns
- Solve Bertrand Nash supply-side model to get retailer margins as a function of the demand substitution patterns
- Bilateral bargaining between multiple manufacturers and multiple retailers yields manufacturer margins as a function of retailer margins and bargaining power parameter

# Data sources and variables

- Weekly information on sales, prices, promotions
  - Ground coffee category, Germany, 2000-2001 (MADAKOM)
  - 7 major national brands, 6 major retail chains
- Monthly brand-level advertising expenditures (AC Nielsen)
- Raw coffee cost (NYSE)
- Manufacturer and retailer characteristics (MADAKOM data)

# Key findings

- Bargaining power is specific to a manufacturer-retailer pair and distinct from brand/store equity.
- Firm size, store brands and service level are important determinants of channel profits and bargaining power.
- Channel profitability is not a zero-sum game
- Decrease in bargaining power does not necessarily mean a decrease in profits.
